# Supplementary material for: Large-scale DNA demethylation occurs in proliferating ovarian granulosa cells during mouse follicular development
Source: PubMed Central journal article supplement (PMC8617273; doi:10.1038/s42003-021-02849-w), 2021-11-25
Supplement: 42003_2021_2849_MOESM3_ESM.pdf [file 42003_2021_2849_MOESM3_ESM.pdf]

## Description of Additional Supplementary Files

**File name:** Supplementary Data 1.

**Description:** Low data in Figures and supplementary figures.
